# Supplementary material for: Unexpected genetic diversity of Mycoplasma agalactiae caprine isolates from an endemic geographically restricted area of Spain
Source: PubMed Central journal article supplement (PMC3514313; doi:10.1186/1746-6148-8-146), 2012-08-27
Supplement: 1746-6148-8-146-S1.pdf [file 1746-6148-8-146-S1.pdf]

**Table S1:** VNTR nucleotide sequences

| <b>VNTR/<br/>Profile</b> | <b>Strains</b> | <b>N° of<br/>repetitions</b> | <b>Sequences</b>                                                                                                                                                                                                                                                                                                                                                                        |
|--------------------------|----------------|------------------------------|-----------------------------------------------------------------------------------------------------------------------------------------------------------------------------------------------------------------------------------------------------------------------------------------------------------------------------------------------------------------------------------------|
| <b>VNTR 5</b>            | <b>AG13</b>    | <b>2.1</b>                   | <u>GAAAGAGAAAGGAAGCTGAAGCAGAGAAAGCCTAAGAAAAATGTAGAGGAATTTAGGAAGCTGTTTA</u><br>AAGAATTAGAAAAAATTA AAAAAGAATATGATGAAGTAAAAAGCAGATTA ACTGGGCCTGAATATGAA<br>ACCATAAAGACTAAATATGAAAGTTTCTTTTATGCAAGTGGATACAATCAATACACACAATTTATGGAGC<br>AATCAAAAAGCGATAATGATCC                                                                                                                                |
| <b>VNTR 5</b>            | <b>PG2</b>     | <b>2.1</b>                   | <u>GAAAGAGAAAGGAAGCTGAAGCAGAGAAAGCCAAGAAAAATGTAGAGGAATTTAGGAAGCTGTTTAAA</u><br>GAATTAGAAAAAATTA AAAAAGAATATGATGAAGTAAAAAGCAGATTA ACTGGGCCTGAATATGAAAC<br>CATAAAGACTAAATATGAAAGTTTCTTTTATGCAAGTGGATACAATCAATACACACAATTTATGGAGCAA<br>TCAAAAAGCGATAATGATCC                                                                                                                                 |
| <b>VNTR 14</b>           | <b>AG 4</b>    | <b>2</b>                     | <u>TTGAAATATCCGCTTAAGAAAAAAGTAATTAATAATTATATATTTTATACTGTTTTAGATTGCTAATTTAG</u><br>ATTGCTAAATAATGACACTAAATCAGTTGATGATAAACTATATTGACTCTCTGTGTCAATTACTATT<br><u>AGCACCATTAATGCAAATT</u>                                                                                                                                                                                                     |
| <b>VNTR 14</b>           | <b>PG2</b>     | <b>2</b>                     | <u>TTGAAATATCCGCTTAAGAAAAAAGTAATTAATAATTATATATTTTATACTGTTTTAGATTGCTAATTTAG</u><br>ATTGCTAAATAATGACACTAAATCAGTTGATGATAAACTATATTGACTCTCTGTGTCAATTACTATT <u>AGC</u><br><u>ACCATTAATGCAAATT</u>                                                                                                                                                                                             |
| <b>VNTR 17</b>           | <b>5632</b>    | <b>6.4</b>                   | <u>TTTAGCTTTTGATTCAATACTTTCTAGTATCTTATTTTTTCATATTTACCTTTTATTTTGTTTCTGTTTATTAC</u><br>CTTTTATATACCTTCTAGTTATTACCTTTATTAGTTGTCTTTTATATACCTTCTATAACCTTCTAGTTTTTAT<br>TACCTTTTATATACCTTCTAGTTACTGTCTTTATTAGTTGTCTTTTATATACCTTCTATAACCTTCTAGTTTT<br>TATTACCTTTTATATACCTTCTAGTTATTGTCTTTTCATATACCTTCTATAACCTTCTAGTTGATGATTGAAT<br>TTATTA AAATTCTCTTATTATCTAGTTTTAAAGA ACTAAATGCTCGCATAATTCTTT |
| <b>VNTR 17</b>           | <b>AG 32</b>   | <b>6.3</b>                   | <u>TTTAGCTTTTTGATTCAATACTTTCTAGTATCTTATTTTTTCATATTTACCTTTTCATATGCCTTCTAGTTATTA</u><br>CCTTTATTAGTTGTCTTTTATATACCTTCTATAACCTTCTAGTTTTTATTACCCTTCATATACCTTCTAGTTA<br>TTACCTTTATTAGTTGTCTTTTATATACCTTCTATAACCTTCTAGTTTTTATTACCCTTTTATATACCTTCTAG<br>TTATTACCTTTATTGGTTGTCTTTTATATACCTTCTATAACCTTCTAGTAGATAATTCAATTTATTA AAAAT<br>CTCTTATTATCTAGTTTTAAAAATCTAAATGCTCGCATAATTCTTT            |

|                |              |            |                                                                                                                                                                                                                                                                                                                                         |
|----------------|--------------|------------|-----------------------------------------------------------------------------------------------------------------------------------------------------------------------------------------------------------------------------------------------------------------------------------------------------------------------------------------|
| <b>VNTR 17</b> | <b>AG 30</b> | <b>4.4</b> | <u>TTTAGCTTTTGATTCAATACTTTCTAGTATCTTATTTTTTCATATTTACCTTTTATTTTGTTTCTATTTATTAC</u><br><u>CTTTTATATACCTTCTAGTTATTACCTTTATTAGTTGTCTTTTATATACCTTCTATTACCTTCTAGTTTTTCAT</u><br><u>TACCTTTTATATACCTTCTAGTTATTGCCTTTATTAGTTGTCTTTTATATACCTTCTATTACCTTCAAGTAG</u><br><u>ATAATTCAATTTATAAAAAATCTCTTATTATCTAGTTTTAAAGATCTAAATGCTCGCATAATTCTTT</u> |
| <b>VNTR 17</b> | <b>PG 2</b>  | <b>2.6</b> | <u>TTTAGCTTTTGATTCAATACTTTCTAGTATCTTATTTTTTCATATTTACCTTTTATTTTGTTTCTATTTATTAC</u><br><u>CTTTTATATACCTTCTAGTTATTACCTTTATTAGTTGTCTTTTATATACCTTCTATTACCTTCAAGTAGATA</u><br><u>ATTCAATTTATTA AAAAATCTCTTATTATCTAGTTTTAAAGATCTAAATGCTCGCATAATTCTTT</u>                                                                                       |
| <b>VNTR 19</b> | <b>AG 14</b> | <b>4.9</b> | <u>TTGCTTCTTGIGCTTCTTTTTTCTTTCTAGCTGCTTCTTCTTGCTTTCTTTTCTCTTCTTTTTGTTTTCTTTCCG</u><br><u>CTTCTTCTTTTGCTTTAGCAGCCTCTTCTTGTATTCTTTTTGTTTCCTCTATTGTATGCGGCATAGCATATGT</u><br><u>GCCACCATTATTTTCTGAATTATCTGGTTGATCCCCTT</u>                                                                                                                 |
| <b>VNTR 19</b> | <b>PG 2</b>  | <b>4.9</b> | <u>TTGCTTCTTGIGCTTCTTTTTGTTTCCTTGTAGCTTCTTCTTGCTTTCTTTTTTCTTCTTGTTGTTTTCTTTCT</u><br><u>TCTTCTTTTGCTTTAGTGGCCTCTTCTTGTATTCTTTTTGCTTCCTCTAATGTATGCGGCATAGCATATGTG</u><br><u>CCACCATTATTTTCTGAATTATCTGGTTGATCCCCTT</u>                                                                                                                    |

---
