# Supplementary material for: Unexpected genetic diversity of Mycoplasma agalactiae caprine isolates from an endemic geographically restricted area of Spain
Source: PubMed Central journal article supplement (PMC3514313; doi:10.1186/1746-6148-8-146), 2012-08-27
Supplement: 1746-6148-8-146-S2.pdf [file 1746-6148-8-146-S2.pdf]

**Table S2:** Southern blot profiles obtained with the probe A3F, the set of individual *vpma* probes and the AGA-BOV probes used in this study.

| Strain | A3F probe                                                                                        | Individual <i>vpma</i> probes |                |                        |            |            |                    | <i>vpma</i> profile | AGA (A) and BOV (B) probes |                |                |    |                |                | AGA/BOV profile |      |
|--------|--------------------------------------------------------------------------------------------------|-------------------------------|----------------|------------------------|------------|------------|--------------------|---------------------|----------------------------|----------------|----------------|----|----------------|----------------|-----------------|------|
|        | Nb of bands<br>[bands size (kb)] <sup>a</sup>                                                    | U                             | V              | W                      | X          | Y          | Z                  |                     | A27                        | A49            | A79            | B4 | B15            | B64            | B88             |      |
| PG2    | 4<br>[2.4/1.4/1.1/0.6]                                                                           | 1<br>[2.4]                    | 1<br>[1.1]     | 3<br>[1.1/0.6/0.3]     | 1<br>[1.1] | 1<br>[1.4] | 1<br>[2.4]         | VP1a                | 1<br>[1.7]                 | 1<br>[2.0]     | 2<br>[3.6/1.5] | 0  | 0              | 1<br>[1.2]     | 0               | AGB1 |
| AG30   | 5<br>[2.6/1.4/1.1/1.2 <sup>b</sup> /0.6]                                                         | 1<br>[2.6]                    | 1<br>[1.1]     | 4<br>[1.1/0.6/0.3/1.5] | 1<br>[1.1] | 1<br>[1.4] | 1<br>[2.6]         | VP2                 | 1<br>[1.7]                 | 1<br>[2.0]     | 2<br>[3.6/1.5] | 0  | 0              | 1<br>[1.2]     | 0               | AGB1 |
| AG33   | 5<br>[2.6/1.4/1.1/1.2 <sup>b</sup> /0.6]                                                         | 1<br>[2.6]                    | 1<br>[1.1]     | 4<br>[1.1/0.6/0.3/1.5] | 1<br>[1.1] | 1<br>[1.4] | 1<br>[2.6]         | VP2                 | 1<br>[1.7]                 | 1<br>[2.0]     | 2<br>[3.6/1.5] | 0  | 0              | 1<br>[1.2]     | 0               | AGB1 |
| AG35   | 5<br>[2.6/1.4/1.1/1.2 <sup>b</sup> /0.6]                                                         | 1<br>[2.6]                    | 1<br>[1.1]     | 4<br>[1.1/0.6/0.3/1.5] | 1<br>[1.1] | 1<br>[1.4] | 1<br>[2.6]         | VP2                 | 1<br>[1.7]                 | 1<br>[2.0]     | 2<br>[3.6/1.5] | 0  | 0              | 1<br>[1.2]     | 0               | AGB1 |
| AG28   | 5<br>[2.6/1.4/1.1/1.2 <sup>b</sup> /0.6]                                                         | 1<br>[2.6]                    | 1<br>[1.1]     | 4<br>[1.1/0.6/0.3/1.5] | 1<br>[1.1] | 1<br>[1.4] | 1<br>[2.6]         | VP2                 | 1<br>[1.7]                 | 1<br>[2.0]     | 2<br>[3.6/1.5] | 0  | 0              | 1<br>[1.2]     | 0               | AGB1 |
| AG18   | 5<br>[2.4/1.4/1.1/1.2 <sup>b</sup> /0.6]                                                         | 1<br>[2.4]                    | 1<br>[1.1]     | 4<br>[1.1/0.6/0.3/1.5] | 1<br>[1.1] | 1<br>[1.4] | 1<br>[2.4]         | VP1b                | 1<br>[1.7]                 | 1<br>[2.0]     | 2<br>[3.6/1.5] | 0  | 0              | 1<br>[1.2]     | 0               | AGB1 |
| AG4    | 5<br>[2.6/1.4/1.1/1.2 <sup>b</sup> /0.6]                                                         | 1<br>[2.6]                    | 1<br>[1.1]     | 4<br>[1.1/0.6/0.3/1.5] | 1<br>[1.1] | 1<br>[1.4] | 1<br>[2.6]         | VP2                 | 1<br>[1.7]                 | 1<br>[2.0]     | 2<br>[3.6/1.5] | 0  | 0              | 1<br>[1.2]     | 0               | AGB1 |
| AG13   | 5<br>[2.1 <sup>b</sup> /1.9/1.8 <sup>b</sup> /1.5 <sup>b</sup> /0.9 <sup>b</sup> ]               | 0                             | 0              | 3<br>[1.3/0.6/0.3]     | 1<br>[1.3] | 0          | 0                  | VP3a                | 0                          | 1<br>[1.1]     | 2<br>[3.6/1.5] | 0  | 0              | 2<br>[2.7/1.2] | 1<br>[3.9]      | AGB2 |
| AG14   | 5<br>[1.5 <sup>b</sup> /1.2 <sup>b</sup> /1.1 <sup>b</sup> /0.9 <sup>b</sup> /0.8 <sup>b</sup> ] | 0                             | 0              | 3<br>[1.3/0.6/0.3]     | 1<br>[1.3] | 0          | 0                  | VP3b                | 0                          | 1<br>[1.1]     | 2<br>[3.6/1.5] | 0  | 0              | 2<br>[2.7/1.2] | 1<br>[3.9]      | AGB2 |
| AG26   | 7<br>[2.3/2.0/1.8/1.4 <sup>b</sup> /1.1 <sup>b</sup> /0.6/0.3]                                   | 1<br>[1.8]                    | 2<br>[2.0/1.8] | 4<br>[2.0/1.8/0.6/0.3] | 1<br>[1.9] | 0          | 3<br>[2.3/2.0/1.8] | VP5                 | 0                          | 2<br>[2.0/1.1] | 2<br>[3.6/1.5] | 0  | 2<br>[3.2/1.9] | 1<br>[1.2]     | 2<br>[3.9/3.5]  | AGB3 |
| AG27   | 7<br>[2.3/2.0/1.8/1.4 <sup>b</sup> /1.1 <sup>b</sup> /0.6/0.3]                                   | 1<br>[1.8]                    | 2<br>[2.0/1.8] | 4<br>[2.0/1.8/0.6/0.3] | 1<br>[1.9] | 0          | 3<br>[2.3/2.0/1.8] | VP5                 | 0                          | 2<br>[2.0/1.1] | 2<br>[3.6/1.5] | 0  | 2<br>[3.2/1.9] | 1<br>[1.2]     | 2<br>[3.9/3.5]  | AGB3 |
| AG29   | 7<br>[2.3/2.0/1.8/1.4 <sup>b</sup> /1.1 <sup>b</sup> /0.6/0.3]                                   | 1<br>[1.8]                    | 2<br>[2.0/1.8] | 4<br>[2.0/1.8/0.6/0.3] | 1<br>[1.9] | 0          | 3<br>[2.3/2.0/1.8] | VP5                 | 0                          | 2<br>[2.0/1.1] | 2<br>[3.6/1.5] | 0  | 2<br>[3.2/1.9] | 1<br>[1.2]     | 2<br>[3.9/3.5]  | AGB3 |
| AG32   | 7<br>[2.3/2.0/1.8/1.4 <sup>b</sup> /1.1 <sup>b</sup> /0.6/0.3]                                   | 1<br>[1.8]                    | 2<br>[2.0/1.8] | 4<br>[2.0/1.8/0.6/0.3] | 1<br>[1.9] | 0          | 3<br>[2.3/2.0/1.8] | VP5                 | 0                          | 2<br>[2.0/1.1] | 2<br>[3.6/1.5] | 0  | 2<br>[3.2/1.9] | 1<br>[1.2]     | 2<br>[3.9/3.5]  | AGB3 |
| AG34   | 7<br>[2.3/2.0/1.8/1.4 <sup>b</sup> /1.1 <sup>b</sup> /0.6/0.3]                                   | 1<br>[1.8]                    | 2<br>[2.0/1.8] | 4<br>[2.0/1.8/0.6/0.3] | 1<br>[1.9] | 0          | 3<br>[2.3/2.0/1.8] | VP5                 | 0                          | 2<br>[2.0/1.1] | 2<br>[3.6/1.5] | 0  | 2<br>[3.2/1.9] | 1<br>[1.2]     | 2<br>[3.9/3.5]  | AGB3 |
| 5632   | 4<br>[1.7 <sup>b</sup> /1.4/1.0 <sup>b</sup> /0.8 <sup>b</sup> ]                                 | 0                             | 0              | 0                      | 0          | 1<br>[1.4] | 1<br>[1.4]         | VP7                 | 0                          | 1<br>[1.1]     | 2<br>[3.6/0.8] | 0  | 0              | 2<br>[2.1/1.2] | 2<br>[2.6/2.1]  | AGB4 |

<sup>a</sup> Number of bands recognized is indicated for each probe used, with estimated band size in brackets.

<sup>b</sup> Bands revealed by A3F hybridization but not by individual *vpma* probes
