# Supplementary material for: Unexpected genetic diversity of Mycoplasma agalactiae caprine isolates from an endemic geographically restricted area of Spain
Source: PubMed Central journal article supplement (PMC3514313; doi:10.1186/1746-6148-8-146), 2012-08-27
Supplement: 1746-6148-8-146-S3.pdf [file 1746-6148-8-146-S3.pdf]

**Table S3:** Description of additional PCR assays conducted in this study, the results of which are summarized in Table 1

| PCR set | Targeted gene/<br>position            | Mnemonic PG2 / 5632 <sup>a</sup>   | Primer pair             | PCR product<br>size (bp)<br>expected in<br>PG2 / 5632 | Melting<br>T <sup>a</sup> | PCR designed                                   |
|---------|---------------------------------------|------------------------------------|-------------------------|-------------------------------------------------------|---------------------------|------------------------------------------------|
| Control | <i>p48</i> (Lipoprotein)              | MAG0120 / MAGa0140                 | P48F / P48R             | 416/416                                               | 50°C                      | In this study                                  |
| Control | <i>polC</i>                           | <i>polC/polC</i>                   | MAPol-1F/<br>MAPol-5R   | 265/265                                               | 49°C                      | <i>Microbiology</i> 2005                       |
| 1       | <i>ISMag1</i> position                | - / MAGa8240                       | xerF / phydR            | 932 / 2463                                            | 55°C                      | <i>J.Bact.</i> 2009                            |
| 1       | <i>ISMag1</i> position                | - / MAGa5890                       | xerF / agpR             | 0 / 1890                                              | 55°C                      | <i>J.Bact.</i> 2009                            |
| 1       | <i>ISMag1</i> position                | - / MAGa5790                       | Mag2F / pv1R            | 0 / 2233                                              | 55°C                      | <i>J.Bact.</i> 2009                            |
| 1       | <i>ISMag1</i> position                | - / -                              | Mag2F / agpR            | 608 / 0                                               | 55°C                      | <i>J.Bact.</i> 2009                            |
| 1       | <i>ISMag1</i> position                | - / MAGa5330                       | pks1F / pks1R2          | 1084 / 2614                                           | 50°C                      | In this study (detail in<br>Figure 2S panel C) |
| 2       | <i>ISMag1</i> position                | - / MAGa4500                       | Bsp6IF /<br>Bsp6IR_5632 | 3201 / 4512                                           | 50°C                      | In this study (detail in<br>Figure 2S panel B) |
| 3       | <i>ISMag1</i>                         | - / all <i>ISMag1</i> <sup>b</sup> | ISMag1F2 /<br>ISMag1R2  | 0 / 970                                               | 55°C                      | In this study                                  |
| 3       | <i>ISMag2</i>                         | - / MAGa1590                       | IS30L / IS30LR          | 0 / 983                                               | 59°C                      | In this study                                  |
| 3       | <i>cds1</i>                           | - / MAGa2970                       | cds1F / cds1R           | 0 / 410                                               | 50°C                      | <i>J Bact</i> 2006                             |
| 3       | <i>cds5</i>                           | - / MAGa3060                       | cds5F-cds5R             | 0 / 214                                               | 50°C                      | In this study                                  |
| 3       | <i>cds22</i>                          | - / MAG3220                        | cds22F / cds22R         | 0 / 401                                               | 50°C                      | <i>J Bact</i> 2006                             |
| 3       | <i>bsp6I methylase</i>                | - / MAGa4250                       | bsp6ImR /<br>bsp6ImF    | 0 / 505                                               | 59°C                      | In this study                                  |
| 4       | <i>DNA methylase</i>                  | - / MAGa2700                       | Met1F/<br>Met1R5632     | 0 / 169                                               | 50°C                      | In this study (detail<br>in Figure 3 panel A)  |
| 4       | <i>cdsH</i>                           | - / MAGa3200,5050,6900             | cdshF / cdshR           | 0 / 208                                               | 57°C                      | In this study                                  |
| 5       | <i>abiGI-like</i>                     | - / MAGa8140                       | aip1F / aip1R           | 0 / 358                                               | 55°C                      | <i>J Bact</i> 2009                             |
| 5       | <i>abiGI-like and<br/>abiGII-like</i> | - / MAGa8140 and<br>MAGa8130       | aip2F / aip2R           | 0 / 1011                                              | 55°C                      | <i>J Bact</i> 2009                             |
| 5       | <i>fic</i>                            | - / MAGa7460                       | ficF5632 / ficR         | 0 / 398                                               | 50°C                      | In this study                                  |
| 5       | <i>dcm</i>                            | - / MAGa3950                       | dcmF / dcmR             | 0 / 653                                               | 59°C                      | In this study                                  |
| 6       | <i>DNA methylase<br/>pseudogene</i>   | MAG2550-2560 / -                   | Met1F/<br>Met1RpG2      | 395 / 0                                               | 50°C                      | In this study (detail<br>in Figure 3 panel A)  |
| 6       | <i>Type III DNA<br/>methylase</i>     | MAG1530                            | Met3FPg2 / tigR         | 2268 / 0                                              | 50°C                      | In this study                                  |

<sup>a</sup> Mnemonic for CDS of *Mycoplasma agalactiae* strains PG2 and 5632 according to Molligen database at <http://cbi.labri.fr/outils/molligen/>

<sup>b</sup> PCR primers matching all 12 copies of *ISMag1* in 5632 genome.
