# Supplementary material for: Unexpected genetic diversity of Mycoplasma agalactiae caprine isolates from an endemic geographically restricted area of Spain
Source: PubMed Central journal article supplement (PMC3514313; doi:10.1186/1746-6148-8-146), 2012-08-27

**Figure S2:** Geographic location of *M. agalactiae* isolates.

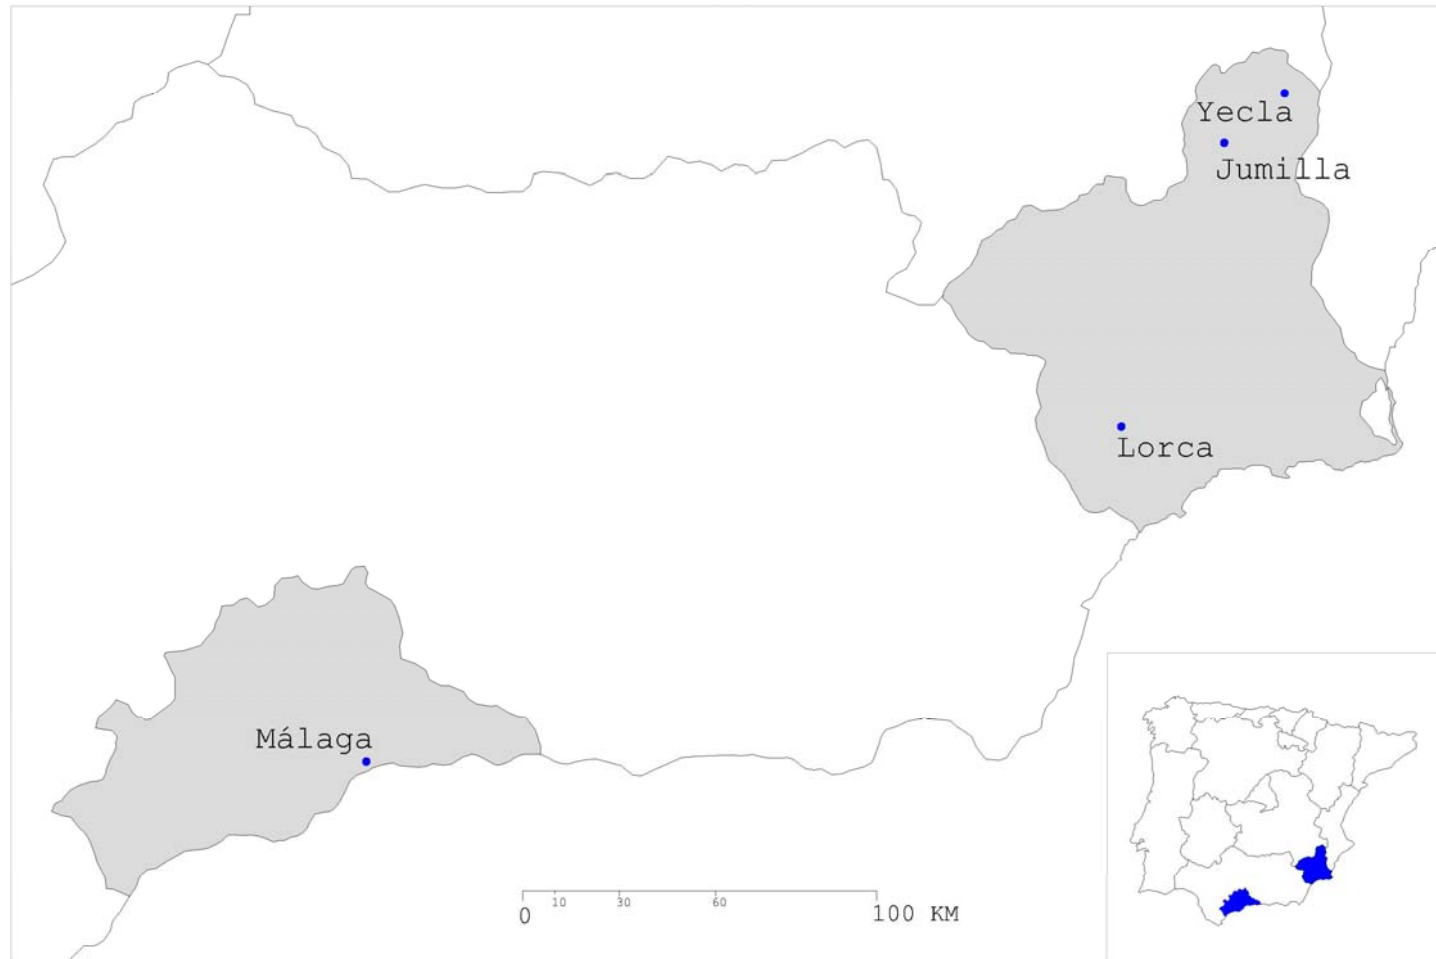

Supplement: 1746-6148-8-146-S5.pdf [file 1746-6148-8-146-S5.pdf]
