# Supplementary material for: Unexpected genetic diversity of Mycoplasma agalactiae caprine isolates from an endemic geographically restricted area of Spain
Source: PubMed Central journal article supplement (PMC3514313; doi:10.1186/1746-6148-8-146), 2012-08-27
Supplement: 1746-6148-8-146-S6.pdf [file 1746-6148-8-146-S6.pdf]

**Table S4:** Primer sequences

| Name         | Sequence (5' to 3')          |
|--------------|------------------------------|
| 5F           | GAAAGAGAAAAGGAAGCTGAA        |
| 5R           | GGATCATTATCGCTTTTTGA         |
| 14F          | TTGAAATATCCGCTTAAGAAA        |
| 14R          | AATTTGCATTTAATGGTGCT         |
| 17F          | TTTAGCTTTTGATTCAATACTTTC     |
| 17R          | AAAGAATTATGCGAGCATTT         |
| 19F          | TTGCTTCTTGTGCTTCTTTT         |
| 19R          | AAGGGGATCAACCAGATAAT         |
| MAPol-1F     | CATTGAACCTCTTATGTCATTTACTTTG |
| MAPol-5R     | CTATGTCATCAGCTTTTGGGTGA      |
| phdR         | TCAGGAATTGAGTGCTGTGC         |
| xerF         | TGCGTAGATCATTGCTTCG          |
| pv1R         | TCTGCCACTGATTACAAC TTATGAA   |
| agpR         | TCAAAAGGATATTTTACACCATGTC    |
| Mag2F        | CTCCGATCTTCTAGCGAAGC         |
| aip1F        | TTGCTTTTGTGCTTAAATACTTGT     |
| aip1R        | TATAGCCACTGTAAACCGTAAC       |
| aip2F        | ATGCAAATGTTTACTACTGTGATAG    |
| aip2R        | TCATCTTTCATTCATCAACGGATT     |
| ISMag1F2     | TGATTGATGAAAACACATTGAGATG    |
| ISMag1R2     | GATGAATAAGGGTGGCAATG         |
| bsp6ImR      | GTCCCCATATTGGCTGTTAAAG       |
| bsp6ImF      | CTGGCTATCGTAAAGGGTTCG        |
| dcmF         | GACGCATGTCAAACGCTAAG         |
| dcmR         | CAAAATTCCAGTTCTGCCACC        |
| IS30L        | GTTCCACACTTGGCAGCAG          |
| IS30L-R2     | CTTTTGCCATAAATTAAGTCGC       |
| cds1F        | CCAGTTGTTACACTTGGCTTTTTT     |
| cds1R        | CAAAGGGTTGTTGCTGATCC         |
| cds5F        | TGGGATGCAAATCAAGACTG         |
| cds5R        | CAAAGCTTTTTGTTTGTGCAAT       |
| cds22F       | TGAGACCAGCAAGCTGAAGA         |
| cds22R       | TCTGTATCAATCTGAATTGCATCAT    |
| Met1F        | TAAGCGCTGTTTCAATGGTC         |
| Met1-R_5632  | GTTTGAAC TGTTATTT CGAAG      |
| Met1-R_Pg2   | CTTTTATGACTGTGATATAGTAA      |
| cdsH-F       | GCGGTTCAAGGAATAGTTGGA        |
| cdsH-R       | ATGTTTAGTTTATCCAATCAGCC      |
| Bsp6IF       | TTATTTGCTGGTATTGGAAGC        |
| Bsp6I-R_5632 | GCACTTCTAGAGTCGTAAC TTC      |
| Met3-F_Pg2   | GATTTGACCATCAGGTGCTTT        |

---

|            |                         |
|------------|-------------------------|
| tig-R      | AAATGCATTGCAAAATGCTG    |
| p48-F      | GCAGCTTGTTTAGTGTCAAAG   |
| p48-R      | CCTAAAGCAACCTTTATAACTG  |
| fic-F_5632 | GCTGACACTAAGAGAAACAGTG  |
| fic-R      | CTACTTGTTCTACCATTACCATC |
| pks1-F     | AGAAGGCTTTAAGGCCGGTA    |
| pks1-R2    | GCCTTTGGTTTCTGTTTTGC    |

---
